# Supplementary material
Source: PubMed Central journal article supplement (PMC7573457)

**Supplemental Table 1. Classification statistics and univariate Cox-PH model for different cut-off value of CURB-65**

| cut-off  | Logistic model          |             |                    |      | Cox model |                       |         |       |
|----------|-------------------------|-------------|--------------------|------|-----------|-----------------------|---------|-------|
|          | Sensitivity<br>(recall) | Specificity | PPV<br>(precision) | NPV  | F1 score  | HR(95% CI)            | p value | AIC   |
| <b>1</b> | 0.90                    | 0.47        | 0.55               | 0.87 | 0.68      | 5.94 ( 1.80, 19.58 )  | 0.0034  | 227.7 |
| <b>2</b> | 0.68                    | 0.81        | 0.72               | 0.78 | 0.70      | 5.04 ( 2.36 , 10.76 ) | <.0001  | 222.1 |
| <b>3</b> | 0.26                    | 1.00        | 1.00               | 0.65 | 0.41      | 5.26 ( 2.31 , 11.98 ) | <.0001  | 229.4 |

PPV: Positive predictive value; NPV: negative predictive value; F1 score was calculated as  $2/(1/\text{precision} + 1/\text{recall})$ . Analysis shows highest F1 score and smallest AIC when CURB-65 was stratified by 2.

**Supplement Table 2 Characteristics according to CURB-65 score**

| Variable                                         | All                   | CURB65 < 2 (N = 45) | CURB65 >=2 (N = 29)    | P value             |
|--------------------------------------------------|-----------------------|---------------------|------------------------|---------------------|
| <b>Demographics and clinical characteristics</b> |                       |                     |                        |                     |
| Age(years)                                       | 64 ( 56, 72)          | 60 ( 51, 65)        | 71 ( 65, 80)           | <b>&lt;0.0001**</b> |
| Gender(Male%)                                    | 43 (58.11%)           | 28 (62.22%)         | 15 (51.72%)            | 0.37                |
| Hypertension_(%)                                 | 23 (31.08%)           | 15 (33.33%)         | 8 (27.59%)             | 0.6                 |
| Diabetes_(%)                                     | 13 (17.57%)           | 7 (15.56%)          | 6 (20.69%)             | 0.57                |
| Length of stay(days)                             | 15.5 ( 9, 27)         | 20 ( 13, 32)        | 10 ( 4, 17)            | <b>0.0005**</b>     |
| <b>Symptoms and signs</b>                        |                       |                     |                        |                     |
| Cough(%)                                         | 52 (70.27%)           | 34 (75.56%)         | 18 (62.07%)            | 0.22                |
| Fever(%)                                         | 57 (77.03%)           | 34 (75.56%)         | 23 (79.31%)            | 0.71                |
| Dyspnea(%)                                       | 40 (54.05%)           | 21 (46.67%)         | 19 (65.52%)            | 0.11                |
| Temperature(°C)                                  | 36.6 ( 36.2, 37.5)    | 36.7 ( 36.3, 37.4)  | 36.5 ( 36.2, 37.55)    | 0.94                |
| Respiratory rate≥24 breaths per min              | 19 (26.39%)           | 5(11.1%)            | 14 (51.85%)            | <b>0.0001**</b>     |
| Heart rate(bpm)                                  | 86 ( 78, 100)         | 85 ( 80, 98)        | 87 ( 78, 110)          | 0.21                |
| SpO2(%)                                          | 96 ( 91, 98)          | 97 ( 93, 98)        | 92 ( 81, 95.5)         | <b>0.0003**</b>     |
| SBP (mmHg)                                       | 131 ( 120, 146)       | 134 ( 125, 146)     | 127 ( 117, 145)        | 0.28                |
| DBP (mmHg)                                       | 79 ( 74, 89)          | 82 ( 78, 91)        | 75 ( 70, 87)           | <b>0.01*</b>        |
| <b>Laboratory Findings</b>                       |                       |                     |                        |                     |
| <b>Complete Blood Count(CBC)</b>                 |                       |                     |                        |                     |
| WBC(*10 <sup>9</sup> /L)                         | 6.7 ( 5.1, 8.2)       | 6.5 ( 4.8, 7.7)     | 8.1 ( 5.7, 11.1)       | <b>0.004**</b>      |
| Neutrophil(*10 <sup>9</sup> /L)                  | 5.55 ( 3.96, 7.2)     | 4.68 ( 3.63, 6.12)  | 7.02 ( 4.45, 10.145)   | <b>0.0007**</b>     |
| Lymphocyte(*10 <sup>9</sup> /L)                  | 0.89 ( 0.58, 1.37)    | 1.05 ( 0.67, 1.41)  | 0.68 ( 0.41, 0.945)    | <b>0.004**</b>      |
| Neutrophil-to-lymphocyte ratio(NLR)              | 6.51 ( 3.43, 10.286)  | 4.34 ( 2.42, 7.25)  | 10.83 ( 4.73, 21.686)  | <b>&lt;0.0001**</b> |
| Hemoglobin(g/L)                                  | 126 ( 111, 142)       | 121 ( 115, 145)     | 127.5 ( 104.5, 138)    | 0.69                |
| Platelet(*10 <sup>9</sup> /L)                    | 190 ( 153, 235)       | 204 ( 168, 235)     | 160 ( 116, 237)        | <b>0.03*</b>        |
| <b>Inflammatory or tissue injury markers</b>     |                       |                     |                        |                     |
| C reactive protein(mg/l)                         | 40.95 ( 10.63, 92.29) | 33.52 ( 6.17, 72.6) | 65.01 ( 24.31, 98.605) | 0.2                 |

|                                          |                      |                      |                      |                     |
|------------------------------------------|----------------------|----------------------|----------------------|---------------------|
| Lactic dehydrogenase(U/L)                | 370 ( 214.5, 531.5)  | 284 ( 199, 408)      | 489 ( 358, 591)      | <b>0.003**</b>      |
| α-Hydroxybutyrate dehydrogenase(U/L)     | 306.5 ( 170, 449)    | 227 ( 151, 343)      | 444 ( 306, 514)      | <b>0.0009**</b>     |
| <b>Liver and renal function</b>          |                      |                      |                      |                     |
| Alanine aminotransferase(U/L)            | 33.5 ( 23, 52)       | 31 ( 22, 51)         | 36 ( 23, 53)         | 0.56                |
| Aspartate aminotransferase(U/L)          | 35 ( 22, 49)         | 30 ( 20, 44)         | 37 ( 25, 60)         | 0.15                |
| Serum pre-albumin(mg/L)                  | 131.4 ( 85.9, 209.9) | 144.3 ( 88.6, 247.6) | 122.9 ( 84.3, 202.5) | 0.18                |
| Serum albumin(g/L)                       | 29.4 ( 25.4, 33.8)   | 31.7 ( 26.1, 38.2)   | 27.1 ( 24.5, 29.4)   | <b>0.006**</b>      |
| Blood urea nitrogen(mmol/L)              | 6.4 ( 4.3, 10.0)     | 4.7 ( 3.7, 6.3)      | 10.0 ( 7.6, 17.2)    | <b>&lt;0.0001**</b> |
| eGFR(ml/min)                             | 90.7 ( 68.9, 111.7)  | 100.0 ( 78.2, 121.9) | 74.0 ( 30.6, 91.3)   | <b>0.0004**</b>     |
| <b>Cardiac injury markers</b>            |                      |                      |                      |                     |
| Creatine kinase(U/L)                     | 78.5 ( 45, 170)      | 62 ( 43, 170)        | 97 ( 46, 187)        | 0.2                 |
| Creatine kinase-MB(U/L)                  | 13 ( 10, 20)         | 12 ( 9, 15)          | 18 ( 13, 26.5)       | <b>0.009**</b>      |
| <b>Coagulation</b>                       |                      |                      |                      |                     |
| Prothrombin time(s)                      | 13.55 ( 12.7, 14.7)  | 13.1 ( 12.45, 14.05) | 14.25 ( 13.2, 15)    | <b>0.006**</b>      |
| Activated partial thromboplastin time(s) | 37.15 ( 33.5, 42.3)  | 37.4 ( 34.55, 41.1)  | 36.7 ( 30.6, 42.5)   | 0.52                |
| D-Dimer(ug/ml)                           | 0.86 ( 0.3, 6)       | 0.51 ( 0.25, 2.34)   | 5.37 ( 0.98, 8)      | <b>0.004**</b>      |

---

**Supplement Table 3 Number of people at risk of death for CURB-65 survival curve**

| Days elapsed | CURB-65 < 2    |                 | CURB65 ≥ 2     |                 |
|--------------|----------------|-----------------|----------------|-----------------|
|              | Number at risk | Number censored | Number at risk | Number censored |
| 0            | 45             |                 | 29             |                 |
| 1            |                |                 | 29             |                 |
| 2            |                |                 | 27             |                 |
| 3            |                |                 | 23             |                 |
| 4            | 45             |                 | 22             |                 |
| 5            | 44             |                 | 21             |                 |
| 6            | 43             |                 |                |                 |
| 7            | 42             | 1               | 19             | 1               |
| 8            |                |                 | 17             |                 |
| 9            | 40             | 3               | 16             |                 |
| 10           |                |                 | 15             |                 |
| 11           |                |                 | 14             |                 |
| 12           | 37             | 4               | 13             |                 |
| 13           | 35             | 5               | 12             | 2               |
| 14           | 33             | 8               | 11             |                 |
| 15           | 30             | 9               | 10             | 3               |
| 16           | 28             | 11              | 9              |                 |
| 17           |                |                 | 8              |                 |
| 18           | 26             | 14              | 7              | 4               |
| 20           | 23             | 15              | 6              | 5               |
| 21           | 22             | 19              | 5              | 6               |
| 22           | 18             | 20              |                |                 |
| 24           |                |                 | 4              |                 |
| 27           | 17             | 21              |                |                 |
| 30           | 16             | 24              |                |                 |
| 31           | 13             | 25              |                |                 |
| 32           | 12             | 26              |                |                 |
| 34           | 11             | 27              |                |                 |
| 35           | 10             | 29              |                |                 |
| 38           | 8              | 30              |                |                 |
| 39           | 7              | 31              |                |                 |
| 40           | 5              | 32              |                |                 |
| 45           | 4              |                 |                |                 |
| 46           | 3              | 34              |                |                 |
| 48           |                |                 | 2              | 7               |
| 49           | 1              | 35              |                |                 |
| 51           |                |                 | 1              | 8               |

# Supplement Figure1

**A Symptoms and Signs for survivor and non-survivors**

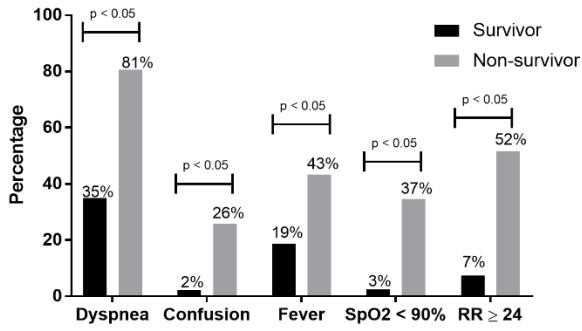

**B CBC abnormalities**

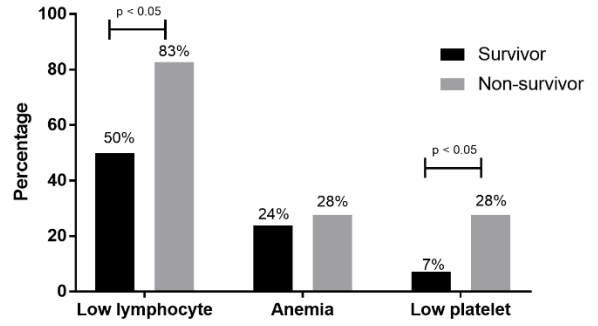

**C Inflammatory and tissue injury markers abnormality**

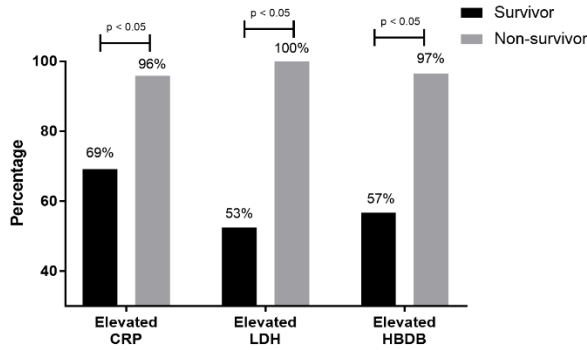

**D**

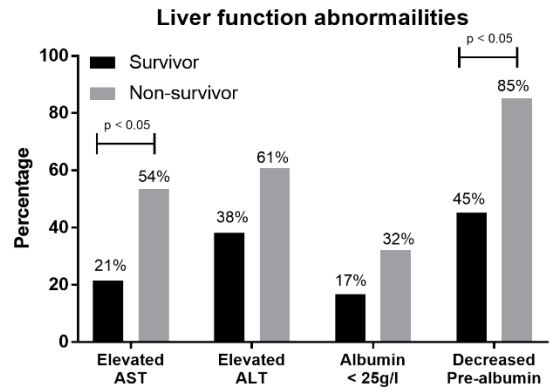

**E Other laboratory abnormalities**

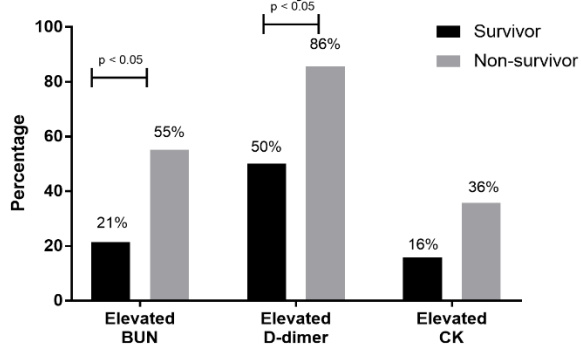

Supplement Figure2

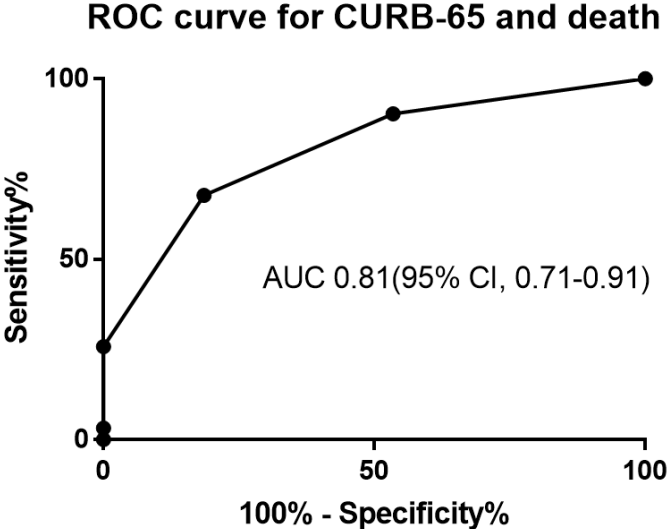

Supplemental Figure 3.

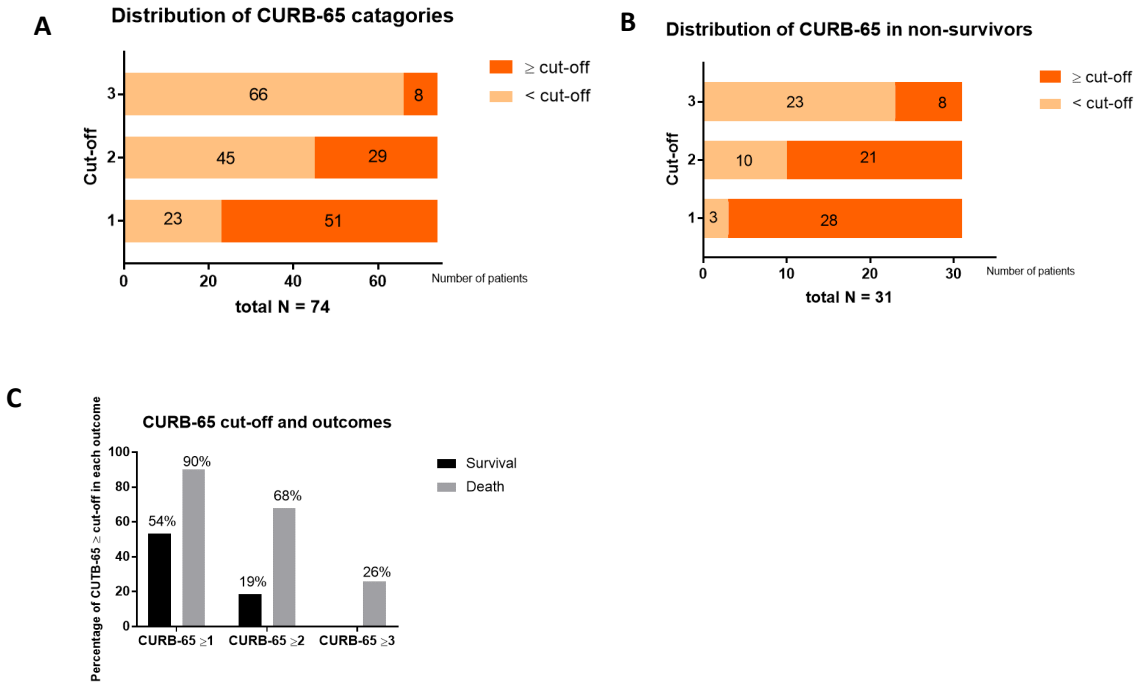

Supplemental Figure 4.

Sensitivity - Specificity curve: CURB-65 and death

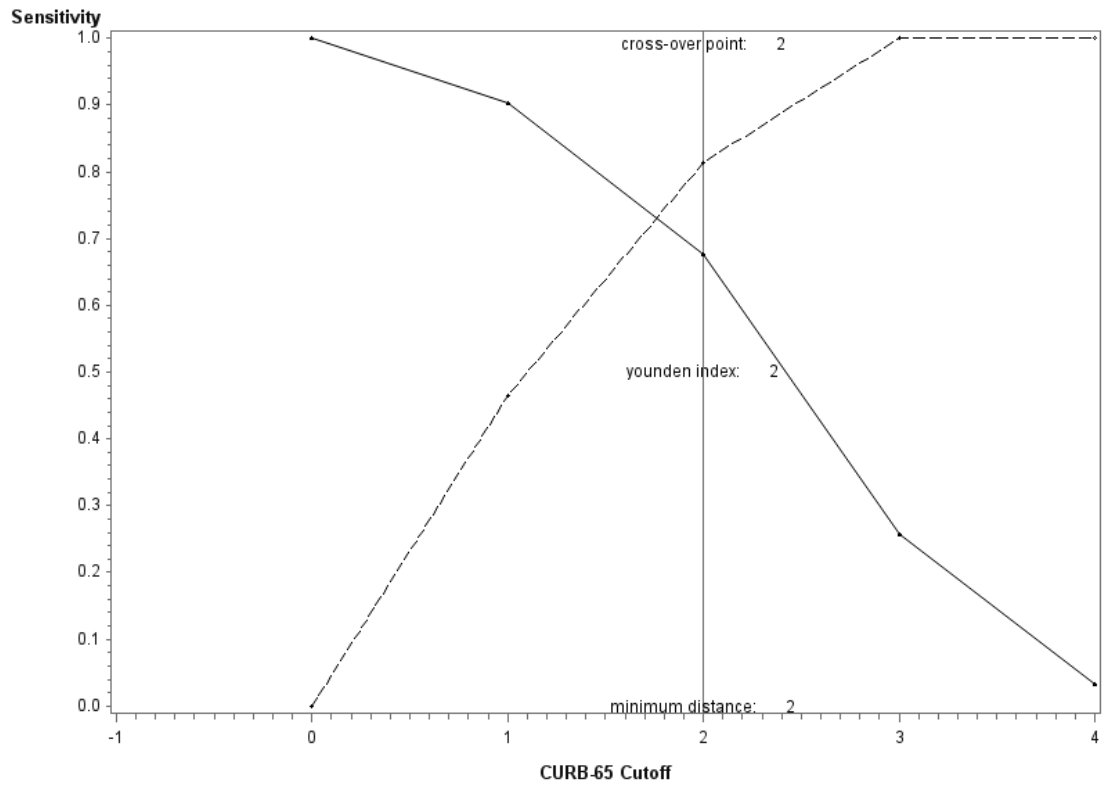



Supplemental Figure 5.

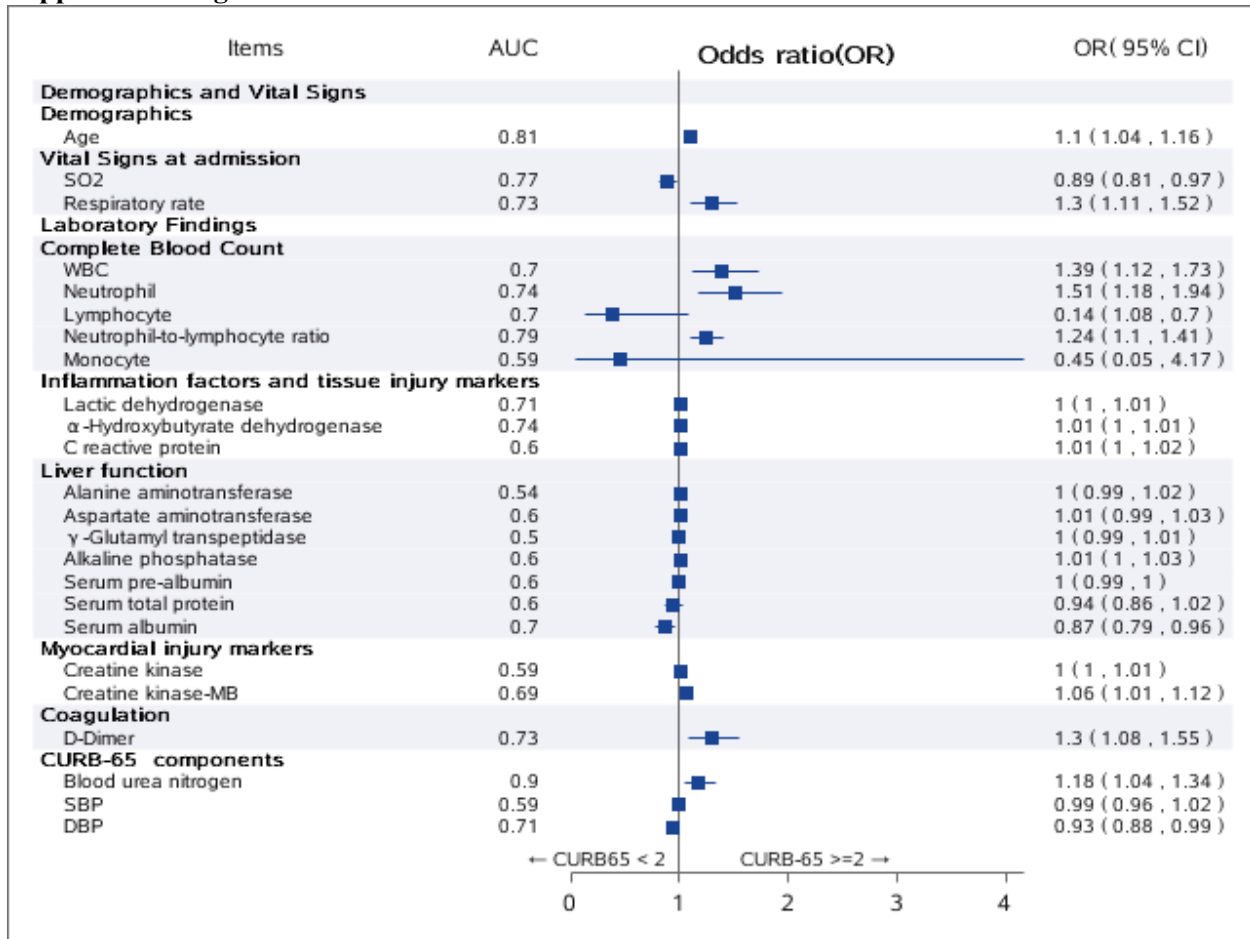

Supplement: S0950268820002368sup001.pdf [file S0950268820002368sup001.pdf]
